# Supplementary material for: A live cell reporter of exosome secretion and uptake reveals pathfinding behavior of migrating cells
Source: PubMed Central journal article supplement (PMC7190671; doi:10.1038/s41467-020-15747-2), 2020-04-29
Supplement: 41467_2020_15747_MOESM1_ESM.pdf [file 41467_2020_15747_MOESM1_ESM.pdf]

**Supplementary Information**

**A live cell reporter of exosome secretion and uptake reveals pathfinding behavior of migrating cells**

Sung et al.

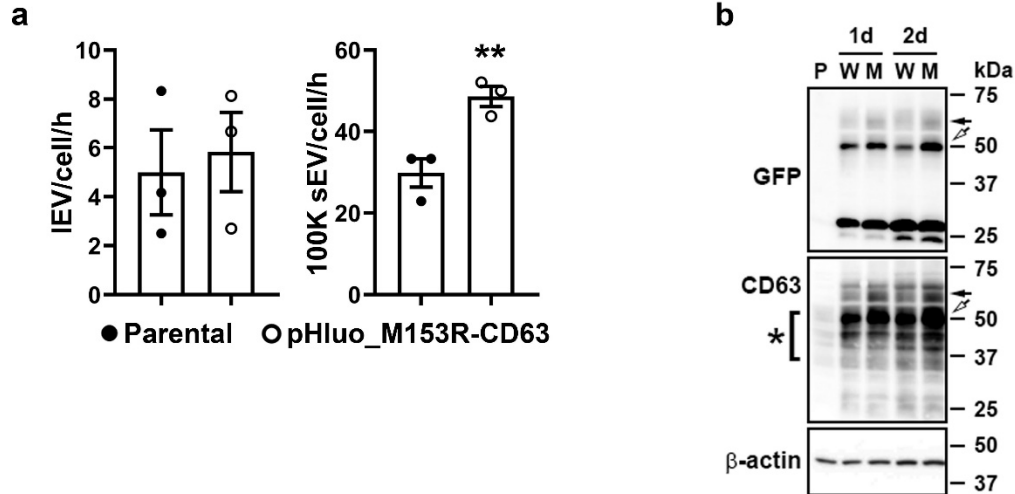

**Supplementary Figure 1. Overexpression of pHLuo<sub>in</sub>\_M153R-CD63 increases secretion rate of exosome-like small EVs.** (a) EV secretion rates measured by NTA. IEV, large EV. sEV, small EV. Mean  $\pm$  standard error from three independent experiments.  $**P=0.00409$  compared with parental cell line by two-sided paired Student's *t*-test. (b) Western blots for transiently transfected HT1080 cells. P, parental cell lysate. W, pcDNA-pHLuo<sub>in</sub>-CD63-transfected cell lysate. M, pcDNA-pHLuo<sub>in</sub>\_M153R-CD63-transfected cell lysate. 1d, 1 day after transfection. 2d, 2 days after transfection. Black arrows indicate full length pHLuo<sub>in</sub>\_M153R-tagged CD63, which is shifted due to the GFP moiety of 27 kDa, while white arrows indicate potential cleaved form of CD63 tagged with pHLuo<sub>in</sub>\_M153R. Asterisk indicates cellular CD63, which has a broad range due to glycosylation. Source data are provided as a Source Data file.

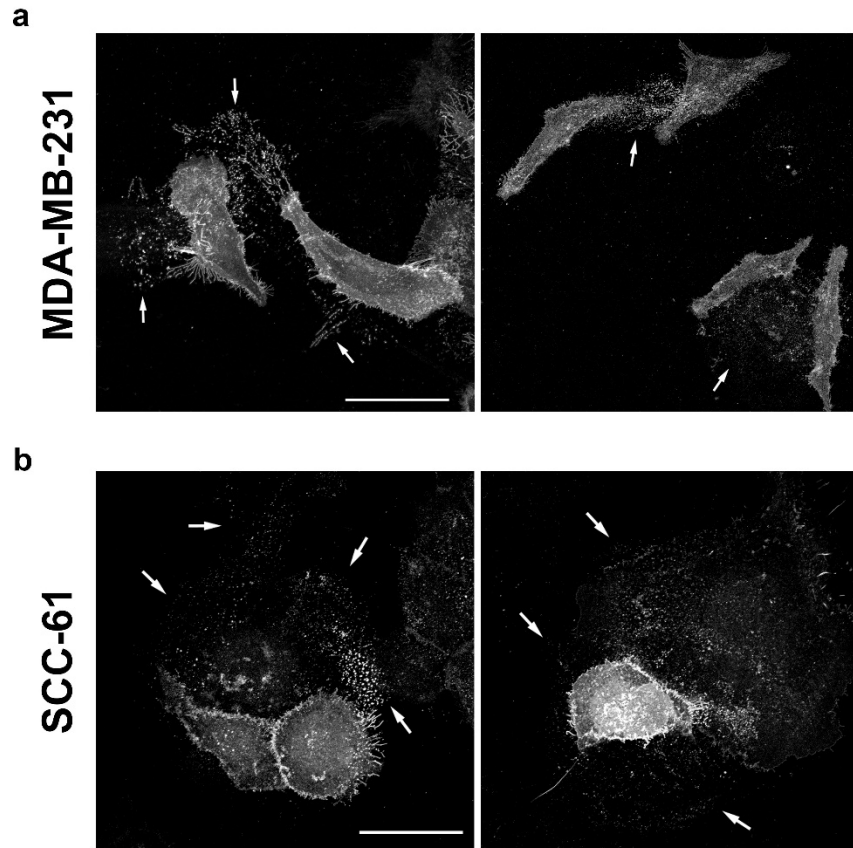

**Supplementary Figure 2. pHluorin\_M153R-CD63-positive trails are deposited from diverse cancer cell types. (a)** Representative fluorescence images of live MDA-MB-231 human breast cancer cells stably expressing pHluo\_M153R-CD63 from 4 independent experiments. Scale bar, 50  $\mu\text{m}$ . **(b)** Representative fluorescence images of live HNSCC-61 human head and neck cancer cells stably expressing pHluo\_M153R-CD63 from 4 independent experiments. Scale bar, 50  $\mu\text{m}$ .

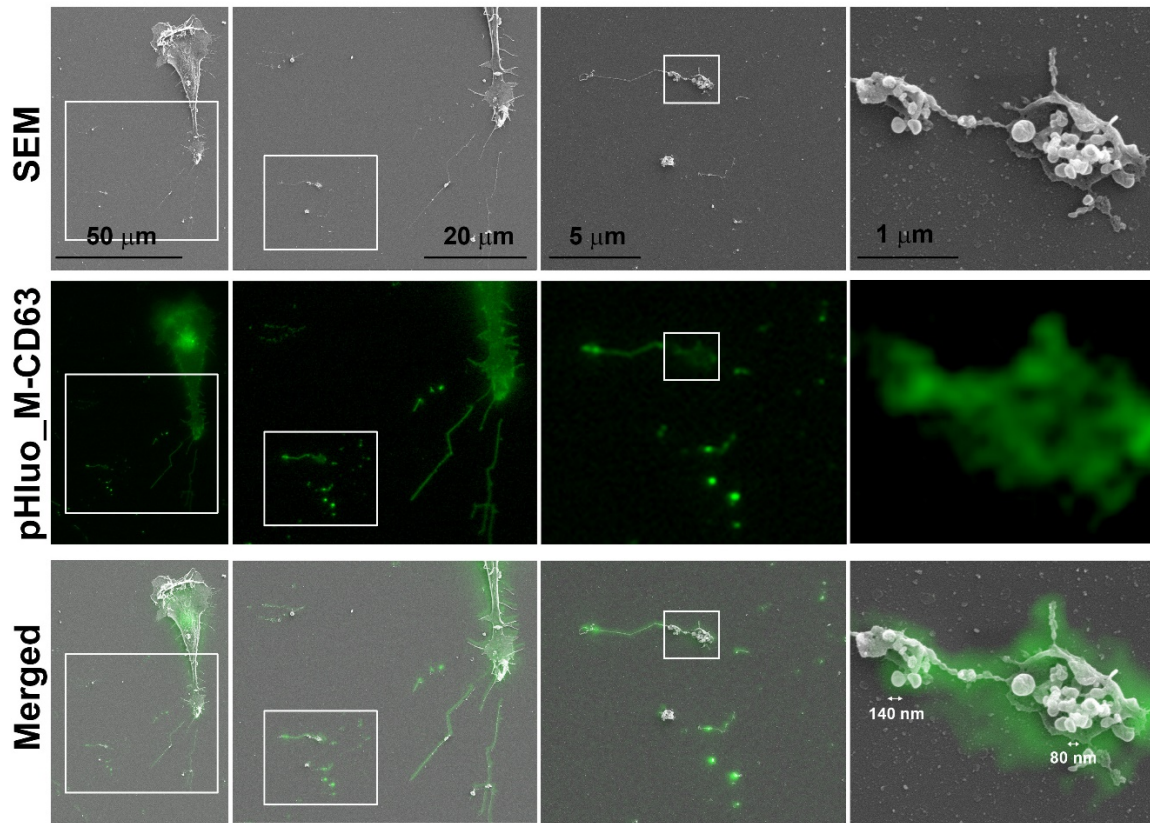

**Supplementary Figure 3. pHLuorin\_M153R-CD63-positive trails mark exosome deposits.** Correlative light-electron microscopy of pHLuo\_M153R-CD63 (green)-stably expressing HT1080. Zoom-in images from the left panel are shown to the right panel. 3 pouches were found from 4 independent experiments as described in the Fig. 3 legend.

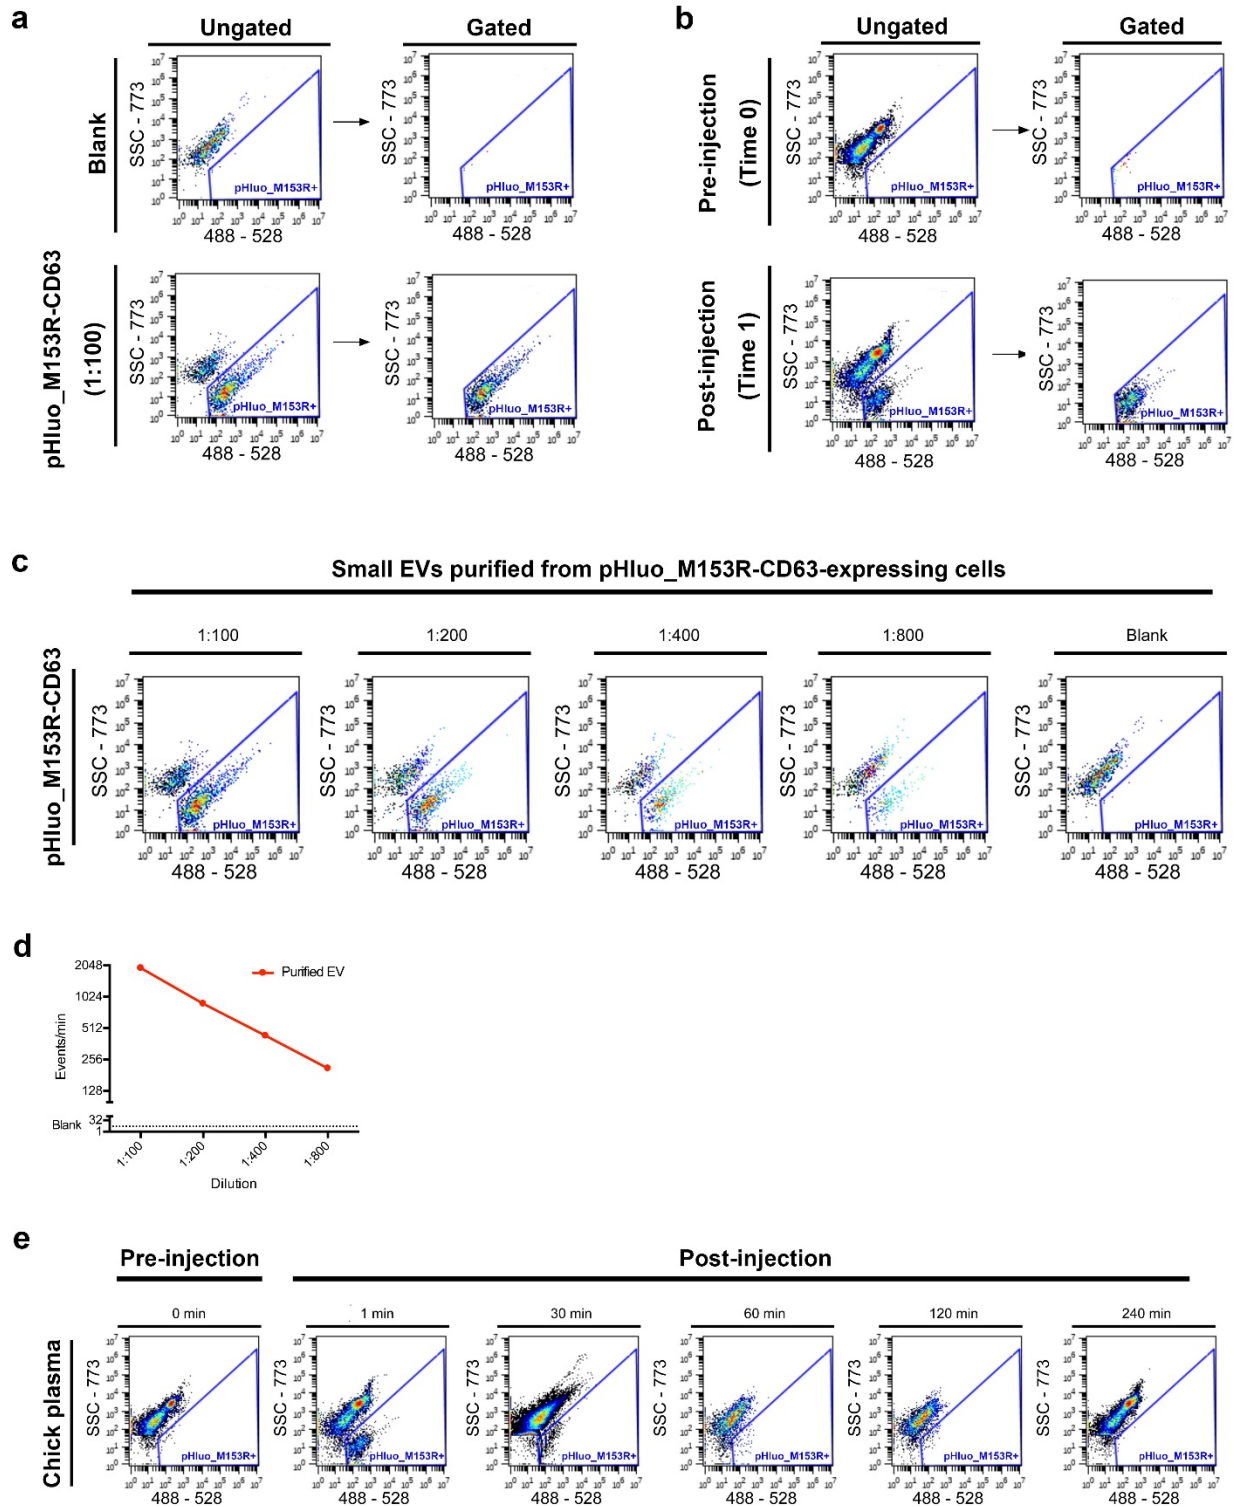

**Supplementary Figure 4. Flow cytometry gating strategy for pHluo\_M153R-CD63 EV detection in plasma.** (a) Gating of pHluo\_M153R-CD63 positive events (pHluo\_M153R+) using blank flow buffer (top) and the 1:100 dilution of 100K-pHluo\_M153R-CD63 EVs in flow buffer (bottom). (b) Gating of plasma background using pre-injection (Time 0 min, top) and post-injection (Time 1 min, bottom) chick

plasma used for half-life determination presented in Fig. 4g. The same gate was set to include pHluo\_M153R+ events from (a) and exclude plasma background. (c) Two-fold dilution series of 100K-pHluo\_M153R-CD63 EVs in flow buffer. (d) Quantification of gated events from (c) at the corresponding dilutions. (e) Detection of fluorescent 100K-pHluo\_M153R-CD63 EVs over time. Pre-injection at time 0 min denotes blank plasma collected from the same chick, while post-injection plasma indicates plasma collected after intravenous injection of 100K-pHluo\_M153R-CD63 EVs at 1 min, 30 min, 60 min, 120 min, and 240 min.

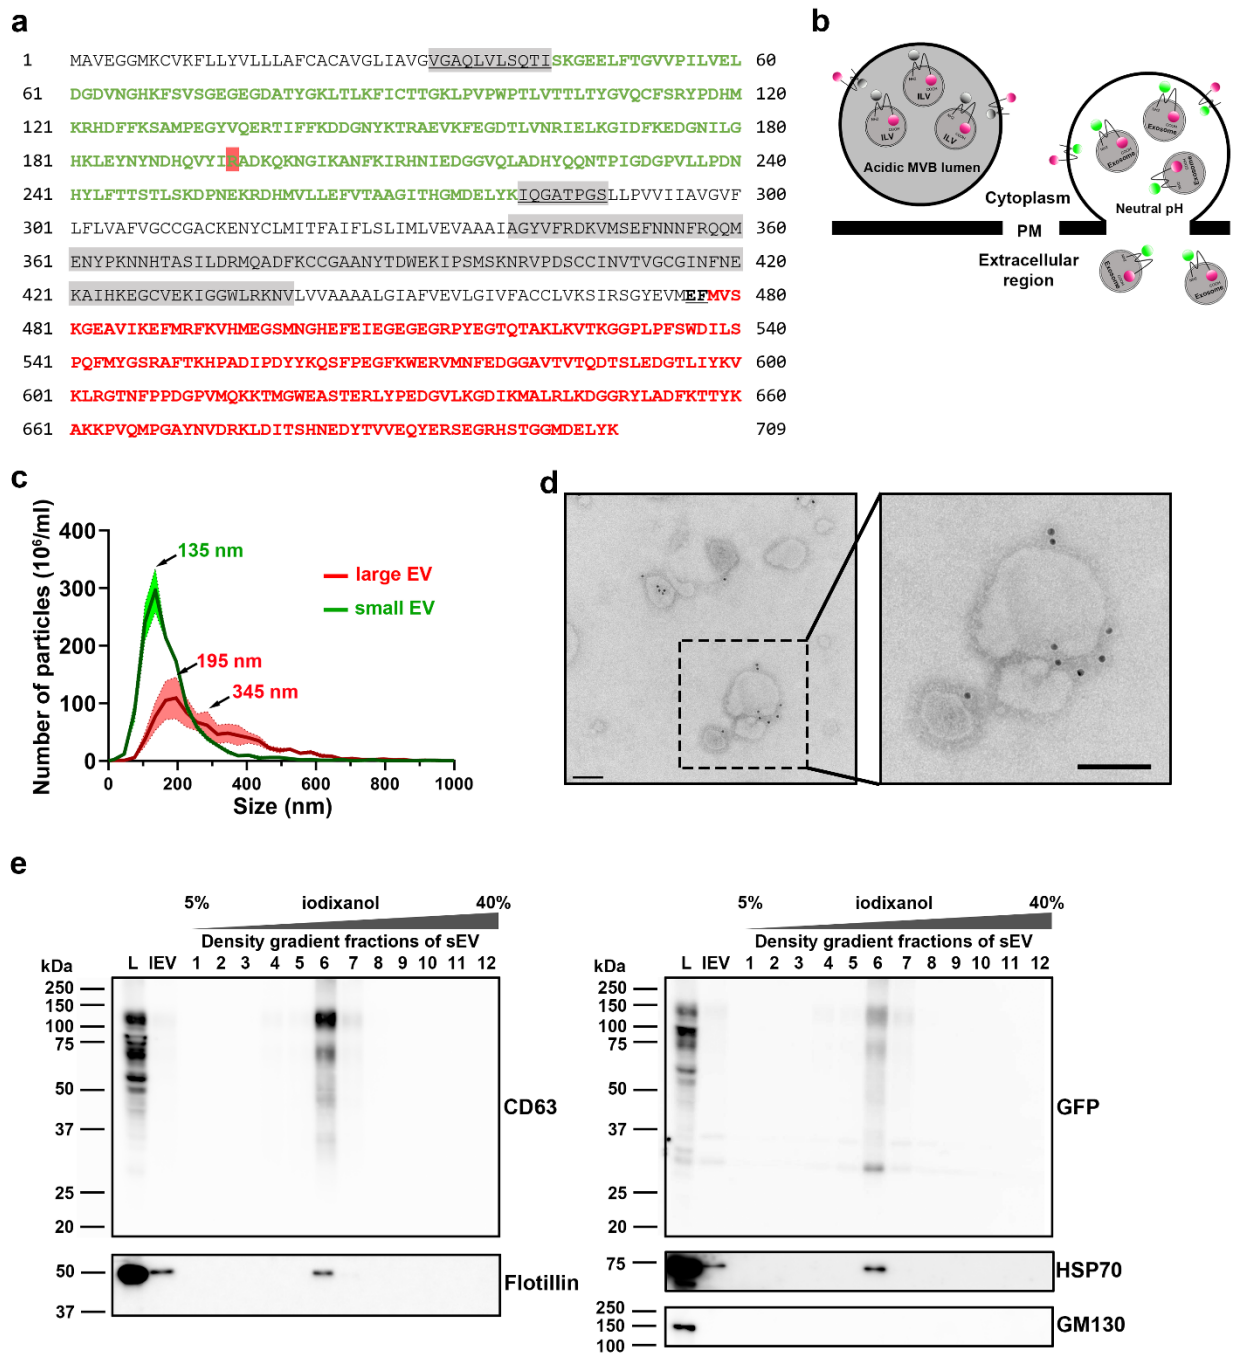

**Supplementary Figure 5. pHluorin\_M153R-CD63-mScarlet is a dual tagged multivesicular body and exosome reporter.** (a) Amino acid sequence of pHluorin\_M153R-CD63-mScarlet. pHluorin sequence is in green color. Highlighted regions in grey represent small (underlined) and large extracellular loops. M153R mutation is highlighted in red. Two extra amino acids between C-terminus of CD63 and N-terminus of mScarlet are underlined in bold. mScarlet sequence is marked in red. (b) Diagram of pHluorin\_M153R-CD63-mScarlet construct. Note that unlike the pHluorin\_M153R tag, mScarlet tag has bright fluorescence in the MVB as well as in small EVs regardless of pH. ILV, intraluminal vesicle. PM,

plasma membrane. **(c)** Averaged trace from nanoparticle tracking analyses of large EVs (IEVs) and small EVs (sEVs) secreted from pHluo\_M153R-CD63-mScarlet expressing HT1080. Shaded area represents s.e.m. from three independent experiments. **(d)** Representative immunogold negative stain electron micrograph of small EVs purified by iodixanol density gradient from pHluorin\_M153R-CD63-mScarlet-expressing HT1080 cells from 2 independent experiments. Scale bar, 100 nm. **(e)** Western blot analysis of cells and EVs with anti-CD63, anti-GFP, EV markers (Flotillin, HSP70) and Golgi marker (GM130). L, total cell lysate. IEV, large EV. sEV, small EV. Source data are provided as a Source Data file.
